# Supplementary material
Source: publisher figshare collection journal article supplement (https://gsapubs.figshare.com/ndownloader/files/22397601)

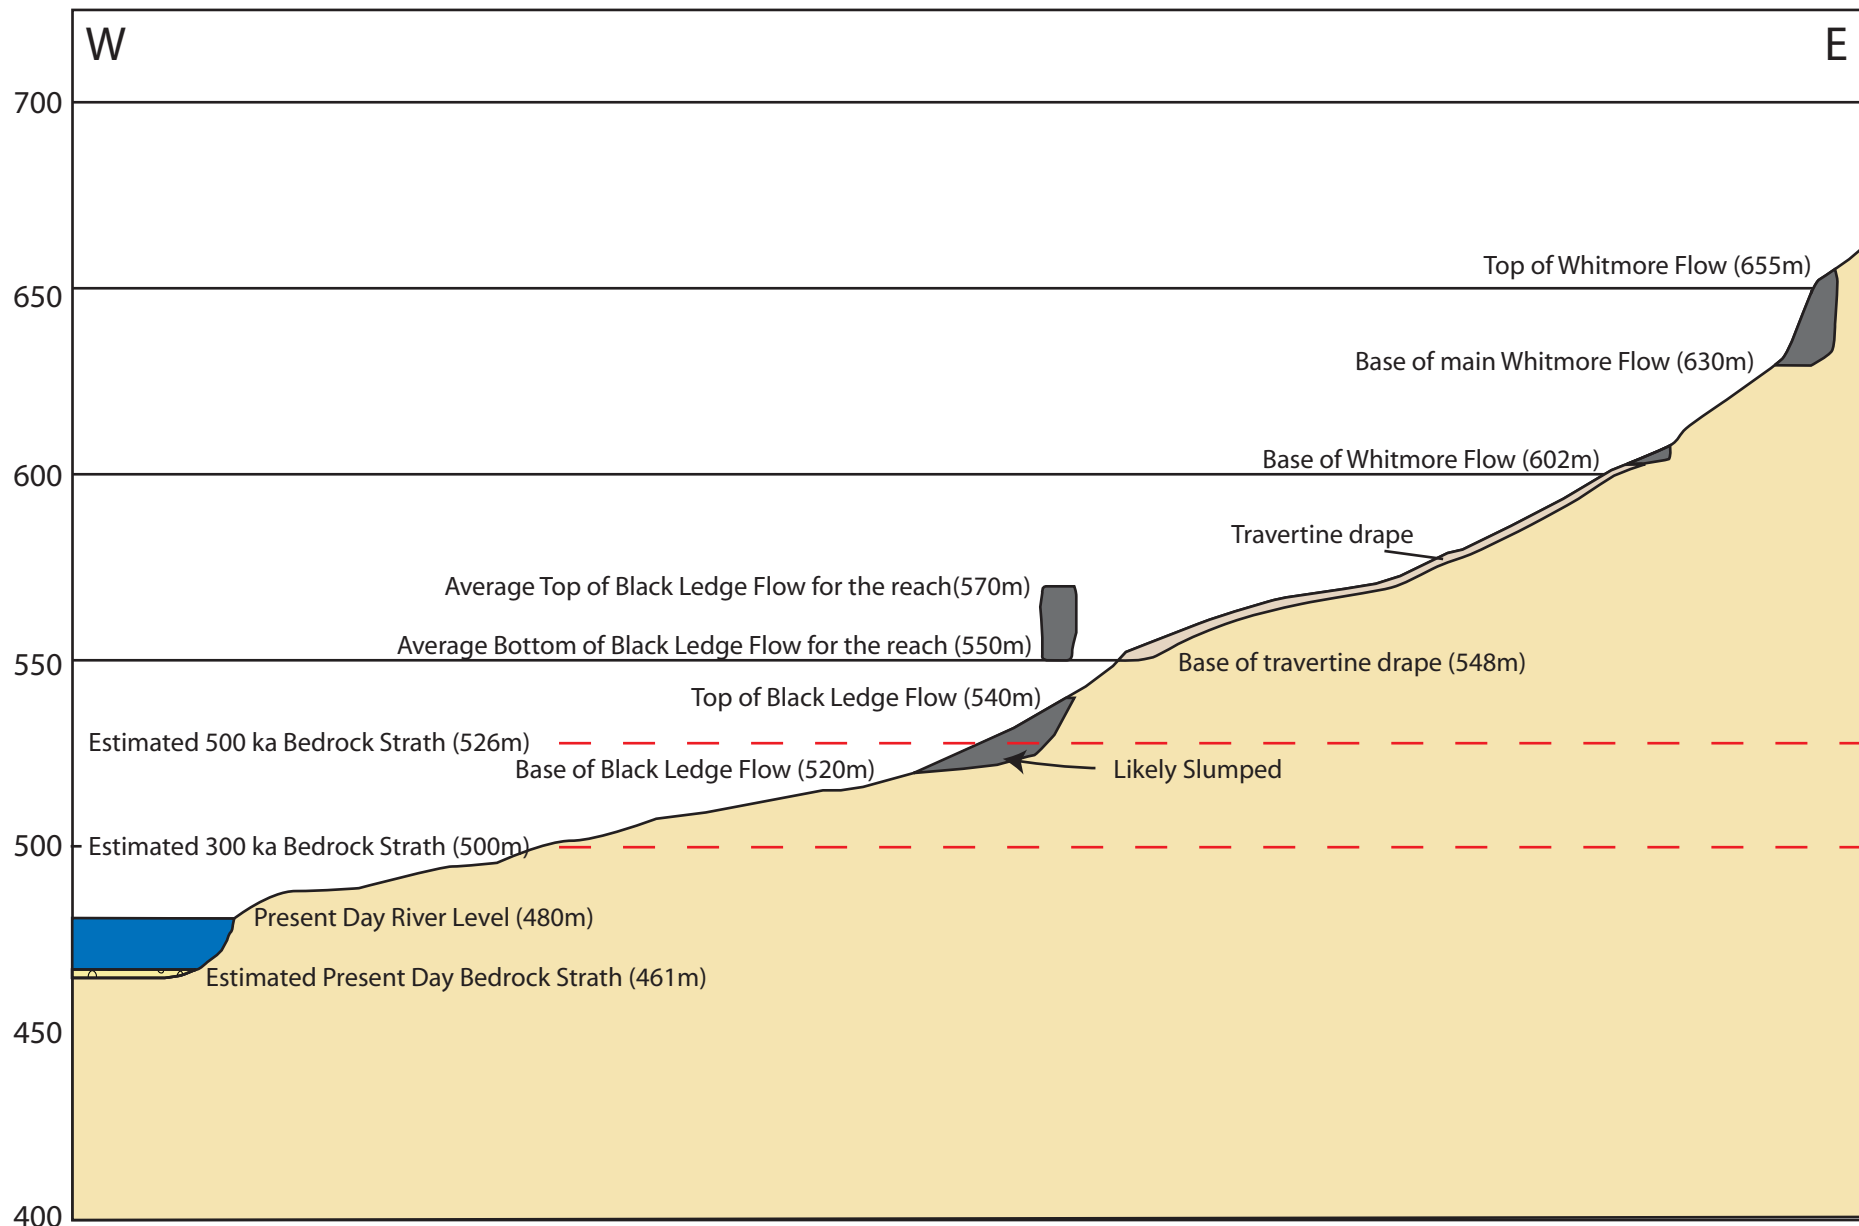

Crow et al., Figure S04

Supplement: Supplementary file 1 [file 22397601]
